## Timescales of adaptation to context in horizontal sound localization

Gabriela Andrejková,<sup>1</sup> Virginia Best,<sup>2</sup> and Norbert Kopčo<sup>1</sup>

<sup>1</sup> *Institute of Computer Science, Faculty of Science, P. J. Šafárik University, Jesenná 5, Košice, 04001, Slovakia*

<sup>2</sup> *Department of Speech, Language, and Hearing Sciences, Boston University, Boston, MA 02215, USA*

Psychophysical experiments explored how the repeated presentation of a context, consisting of an adaptor and a target, induces plasticity in the localization of an identical target presented alone on interleaved trials. The plasticity, and its time course, was examined both in a classroom and in an anechoic chamber. Adaptors and targets were 2-ms noise clicks and listeners were tasked with localizing the targets while ignoring the adaptors (when present). The context had either a fixed temporal structure, consisting of a single-click adaptor and a target, or its structure varied from trial to trial, either containing a single-click or an 8-click adaptor. The adaptor was presented either from a frontal or a lateral location, fixed within a run. The presence of context caused responses to the isolated targets to be displaced up to 14° away from the adaptor location. This effect was stronger and slower if the context was variable, growing over the 5-minute duration of the runs. Additionally, the fixed-context buildup had a slower onset in the classroom. Overall, the results illustrate that sound localization is subject to slow adaptive processes that depend on the spatial and temporal structure of the context and on the level of reverberation in the environment.

## 1 I. INTRODUCTION

2 Auditory spatial perception is highly adaptive (Carlile, 2014; King et al., 2000). Changes in  
3 horizontal sound localization can be induced by visual stimulation (Recanzone, 1998), feedback  
4 training (Klingel et al., 2021; Shinn-Cunningham et al., 1998), a change in the acoustic environment  
5 (Shinn-Cunningham et al., 2005), alterations in the mapping between acoustic cues and source  
6 locations (Kumpik et al., 2010; Trapeau & Schoenwiesner, 2018; van Wanrooij & van Opstal, 2007),  
7 or by other stimuli presented either simultaneously with the target (Braasch & Hartung, 2002), or  
8 preceding the target (Kopčo et al., 2010). The adaptation induced by preceding stimulation has been  
9 observed on long time scales of tens of seconds and minutes, e.g., in the auditory localization  
10 aftereffect induced by prolonged presentation of an adaptor (Carlile et al., 2001; Phillips & Hall,  
11 2005; Thurlow & Jack, 1973), or in the precedence buildup induced by repeated presentation of  
12 ‘lead-lag’ stimulus pairs (Djelani & Blauert, 2001; Freyman et al., 1991). Studies of auditory  
13 localization aftereffects typically used a long continuous adaptor immediately followed by a target  
14 (Carlile et al., 2001; Thurlow & Jack, 1973), or even overlapping with the target (Canévet & Meunier,  
15 1996). They observed a repulsion by the adaptor, i.e., biases in the perceived target locations away  
16 from the adaptor location. Here, we examine an adaptive effect qualitatively similar to the  
17 localization aftereffect but induced by the trial-to-trial acoustic “context” in which target sounds are  
18 presented. In our experiments, the target is a 2-ms broadband noise burst (referred to here as a  
19 ‘click’) (Kopčo et al., 2007). On some trials it is immediately preceded by an identical adaptor click  
20 (or clicks), and on other trials it is presented in isolation. Of interest here are localization biases for  
21 the target-only trials that are induced when those trials are randomly interleaved with adaptor-target  
22 trials. This effect, called *contextual plasticity* (CP), was observed in our previous work as repulsive  
23 biases of up to 10° in localization of the single-click targets.

24 Several different mechanisms have been proposed as underlying localization biases. First, some  
25 adaptation or fatiguing of the peripheral neural representation due to prolonged stimulation is often  
26 assumed (Carlile et al., 2001; Flugel, 1921). Second, a rebalancing of the putative hemispheric  
27 channels subserving spatial processing in humans has been proposed (Dingle et al., 2012; Phillips &  
28 Hall, 2005). Third, recent models based on known physiology of subcortical binaural circuits suggest  
29 that adaptation in response to the preceding context causes a rescaling of the spatial representation  
30 with the goal of increasing perceptual spatial separability of frequently presented sounds at the cost  
31 of inducing localization biases (Dahmen et al., 2010; Lingner et al., 2018; Maddox et al., 2014).  
32 Finally, an active centrally driven suppression of reverberation has been proposed for the  
33 precedence buildup, a potentially related phenomenon (Clifton et al., 2002).

34 The current study is the fourth in a series that examines CP. The original study (Kopčo et al.,  
35 2007) reported CP as an unexpected effect observed both in anechoic and reverberant rooms.  
36 Kopčo et al., (2015) showed that the effect is driven by adaptation in auditory perceptual  
37 representations as opposed to motor response-related representations, as it was observed for various  
38 response methods and with or without visual inputs. Finally, Hládek et al., (2017) showed that the  
39 strength of CP depends on the number of adaptor clicks and their similarity to the target. The goal  
40 of this fourth study is to examine how variability in the context affects CP and to present a detailed  
41 analysis of the temporal profile of CP.

42 Our analysis is based on data from two experiments using an identical design: one performed in a  
43 small classroom (Exp. 1) and one performed in an anechoic chamber (Exp. 2). While the  
44 experiments were primarily designed to examine the fast adaptation effects of the immediately  
45 preceding adaptors on timescales shorter than 0.5 secs (these data were reported in (Kopčo et al.,  
46 2007, 2017), the current study only focuses on the slower effects related to CP (some of which were  
47 reported in the previous studies without detailed analysis). In the experiments, CP was induced by

48 context trials in which the adaptor was located either in front of or to the side of the listener (Fig.  
49 1A), in one of two stimulus conditions (Fig. 1B): in the *fixed context* condition, the adaptor always  
50 contained one click (Kopčo et al., 2007), while in the *variable context* condition, the adaptor was either  
51 a single click or a train of 8 clicks, varying from trial to trial (Kopčo et al., 2017).

52 We addressed several questions related to the time course of CP. First, while we expected that CP  
53 would be stronger in the variable context condition as the average number of context clicks is higher  
54 in this condition (Hládek et al., 2017), we tested the hypothesis that it might also be slower to  
55 asymptote as the context varies from trial to trial. We also hypothesized that CP may be weaker  
56 and/or slower in the reverberant environment, as reverberation tends to make the spatio-temporal  
57 distribution of stimuli more uniform, which may reduce the strength of adaptation. Finally, we  
58 examined whether CP has a fast component on the time scale of seconds, observable when the  
59 context is varying from trial to trial.

60

## 61 **II. METHODS**

62 The data described here were collected as part of two experiments previously reported in (Kopčo  
63 et al., 2007, 2017). The subjects, environments, and stimuli are the same as in those studies, but are  
64 briefly described again here.

### 65 **A. Subjects**

66 Seven listeners (three females) with ages ranging from 23 to 32 years participated in Exp. 1  
67 (Classroom), and four of these listeners also participated in Exp. 2 (Anechoic Room). All listeners  
68 reported normal hearing and gave informed consent as approved by the Institutional Review Board.

### 69 **B. Setup and listening environment**

70 Exp. 1 was conducted in an empty, quiet rectangular reverberant room. The reverberation times in  
71 octave bands centered at 500, 1000, 2000, and 4000 Hz were 613, 508, 512, and 478 ms, respectively.

72 The background noise level was 39 dBA. Exp. 2 was conducted in an anechoic room. Nine  
73 loudspeakers (Bose Acoustimass, Bose, Framingham, MA) were positioned on an arc with diameter  
74 of 1.2 m spanning 90°. The listener was seated approximately in the center of either room with  
75 his/her head held stable by a headrest. He/she sat in the center of the arc and faced either the left-  
76 most loudspeaker (so that the targets occurred on his/her right, see Fig. 1A) or the right-most  
77 loudspeaker (setup mirror-flipped compared to Fig. 1A). In the following, 0° azimuth always  
78 represents the location directly ahead of the listener, and 90° is the location of the left- or right-most  
79 speaker (depending on the listener orientation). Digital stimuli were generated by a TDT System 3  
80 audio interface and passed through power amplifiers (Crown D-75A, Crown Audio, Elkhart, IN) to  
81 the loudspeakers. The listener kept their eyes closed during experimental runs and held a pointer in  
82 one hand for indicating the perceived direction of each target. A Polhemus FastTrak electromagnetic  
83 tracker was used to measure the location of the listener's head, the approximate location of the  
84 loudspeakers, and the listener's responses.

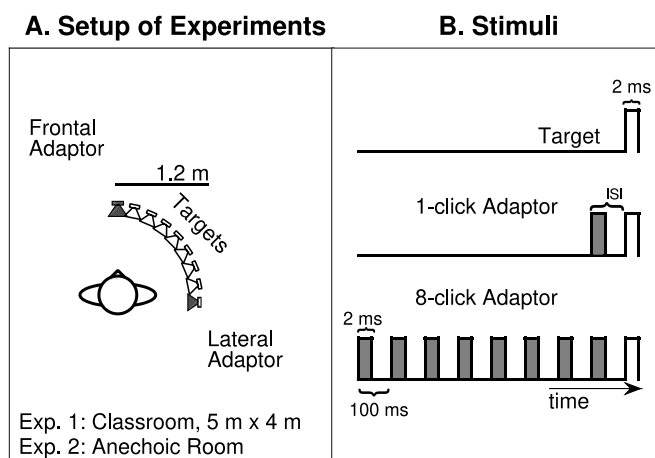

85  
86 FIG. 1. Experimental setup and stimuli. A. Arrangement of the loudspeaker array (shown here on  
87 the subject's right-hand side). The adaptor (loudspeaker in grey color) was in the frontal position for

88 half of the runs and in in the lateral position for the other half. B. Temporal structure of the target-  
89 only and adaptor-target stimuli, with adaptor in grey and target in white. Inter-stimulus interval, the  
90 time interval between the final adaptor click onset to the target click onset, ranged from 25 to 400  
91 ms.

### 92 **C. Stimuli and procedure**

93 The target was a single 2-ms frozen noise burst (click) presented at 67 dBA (Fig. 1B). An identical  
94 click was used for the adaptor in the 1-click context trials. Eight such clicks presented at the rate of  
95 10/sec ( $T = 100$  ms) made up the adaptor in the 8-click context trials. Within a run, the context was  
96 either fixed or variable. In the fixed context runs, only the 1-click contexts were used, the ratio of  
97 contextual to target-only trials was 5:1, and the adaptor-target inter-stimulus interval, measured from  
98 the peak of the final adaptor click to the peak of the target click, was 25, 50, 100, 200, or 400 ms. In  
99 the variable context runs, the ratio of 8-click context to 1-click context to target-only trials was 2:2:1  
100 and the inter-stimulus interval was 50 or 200 ms. On each trial, the target location was randomly  
101 selected from one of the seven central loudspeakers (spanning approximately  $11^{\circ}$ – $79^{\circ}$  azimuth),  
102 while the adaptor, if any, was played from a loudspeaker that was fixed within a run. Every  
103 combination of the six (fixed context) or five (variable context) trial types and seven target locations  
104 was presented four times in random order within a run, resulting in 168 trials in the fixed context  
105 runs and 140 trials in the variable context runs. The subject changed his/her orientation after each  
106 run to face either the left-most loudspeaker or the right-most loudspeaker by rotating his/her whole  
107 body.

108 Exps. 1 and 2 each comprised eight sessions, 4 for the fixed context and 4 for the variable  
109 context. Each session, which took approximately 30 min, contained four randomly ordered runs,  
110 one for each combination of subject orientation (facing the left-most speaker, facing the right-most  
111 speaker) and context adaptor location (frontal, lateral). The total duration of a run was relatively

112 consistent, with across-subject means and standard deviations of  $5.3 \pm 0.6$  min (Exp. 1, fixed  
113 context),  $5.1 \pm 0.7$  min (Exp. 2, fixed context),  $5.6 \pm 0.6$  min (Exp. 1, variable context), and  $5.3 \pm 0.5$   
114 min (Exp. 2, variable context).

#### 115 **D. Data analysis**

116 The current analyses focus exclusively on data from the target-only trials (see Kopčo et al., 2007,  
117 2017) for the analysis of the context trial data). There were only small differences between the data  
118 sets collected with the two subject orientations, and thus the data were collapsed across the  
119 orientations and sessions and analyzed as if the subject always faced the leftmost loudspeaker. Since  
120 only a subset of the Exp. 1 subjects participated in Exp. 2, data are also presented for this subset of  
121 4 subjects in Exp. 1, to allow a direct comparison of the effect of room across the subjects. To  
122 analyze the temporal profile of CP, data from each run were divided into 4 subruns, as each run  
123 contained 4 repetitions of each stimulus combination, presented in a pseudo-random order such that  
124 any combination was repeated only after all other combinations were presented. All reported  
125 statistical analyses were performed as multi-way repeated measures analyses of variance (ANOVAs),  
126 using CLEAVE software (Herron, 2005). The reported statistical values were corrected for potential  
127 violations of sphericity using the Greenhouse-Geisser epsilon.

128

### 129 **III. RESULTS**

130 Three analyses are presented in the following sections. The first analysis focuses on the spatial  
131 profile of CP and its change over time (Section III.A). Then, the temporal profile of the CP is  
132 analyzed on time scales of minutes (Section III.B) and seconds (Section III.C).

#### 133 **A. Spatial and temporal profiles of contextual plasticity**

134 Fig. 2 shows the across-subject mean bias in localization responses as a function of target  
135 location, separately for the two context adaptor locations (circles for frontal vs. triangles for lateral),

136 the two context conditions (red for fixed, blue for variable), and the two experiments (panels A and  
 137 B for Exp. 1, C for Exp. 2). Panel B shows the Exp. 1 data for the 4 subjects who also participated  
 138 in Exp. 2.

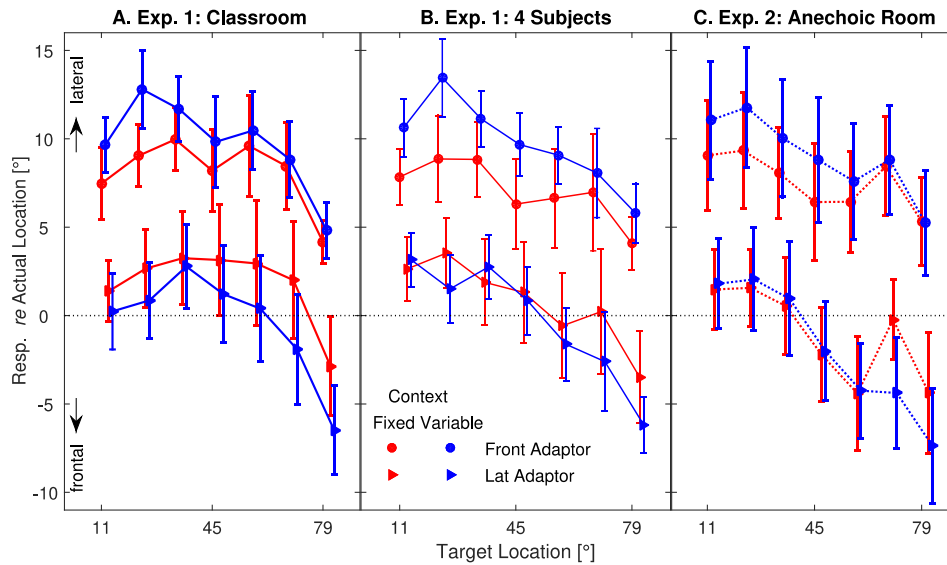

139  
 140 FIG. 2. Mean response biases (+SEM) in target-only trials in Exp. 1 (panel A) and Exp. 2 (panel C),  
 141 plotted as a function of target location separately for each combination of context type and adaptor  
 142 location. Panel B shows the Exp. 1 data for the 4 subjects who participated in Exp. 2.

143 To analyze the mean bias results, two ANOVAs were performed. The first ANOVA considered  
 144 the Exp. 1 data on all 7 subjects (panel A), with factors of *Adaptor location* (frontal, lateral), *Target*  
 145 *location* (7 locations from 11° to 79°), *Context type* (fixed, variable), and *Subrun* (1 to 4). This ANOVA  
 146 found significant main effects of *Adaptor location* ( $F(1,6)=56.93, p=0.003, \eta_p^2=0.905$ ) and *Target*  
 147 *location* ( $F(96,36)=4.76, p=0.0012, \eta_p^2=0.442$ ), as well as significant interactions of *Target location*  $\times$   
 148 *Subrun* ( $F(18,108)=2.24, p=0.0057, \eta_p^2=0.272$ ), *Adaptor location*  $\times$  *Subrun* ( $F(3,18)=27.52, p=0.0000,$   
 149  $\eta_p^2=0.821$ ), *Context type*  $\times$  *Adaptor location* ( $F(1,6)=11.49, p=0.0147, \eta_p^2=0.657$ ), and *Context Type*  $\times$   
 150 *Target location* ( $F(6,36)=3.95, p=0.0039, \eta_p^2=0.397$ ). The second ANOVA considered both rooms



151 and was restricted to the 4 subjects who performed the experiments in both rooms (panels B and C).  
152 It had an additional factor of *Room* (anechoic, reverberant), and it found significant interactions of  
153 *Context Type*  $\times$  *Room*  $\times$  *Subrun*  $\times$  *Adaptor location* ( $F(3,9)=4.84$ ,  $p=0.0285$ ,  $\eta_p^2=0.617$ ), *Context type*  $\times$   
154 *Target location* ( $F(6,18)=6.19$ ,  $p=0.0012$ ,  $\eta_p^2=0.674$ ), *Context type*  $\times$  *Adaptor location* ( $F(1,3)=12.54$ ,  
155  $p=0.0383$ ,  $\eta_p^2=0.807$ ), and *Subrun*  $\times$  *Adaptor location* ( $F(3,9)=35.62$ ,  $p=0.0000$ ,  $\eta_p^2=0.922$ ). No other  
156 main effects or interactions reached significance.

157 The data in Fig. 2 indicate that localization responses were biased relative to the actual target  
158 locations. The frontal context data (circles) were biased laterally by approximately 5 to 13°, while the  
159 lateral context data (triangles) were biased by -5 to 5°. Such “global” response biases are common in  
160 localization experiments and arise from a combination of factors including the response method  
161 (Kopčo et al., 2015). Of more interest here are differences in the bias depending on the context. The  
162 clearest effect shown in Fig. 2 is that the responses with frontal contexts are always biased more  
163 laterally than the responses with lateral contexts (triangles fall under circles in all three panels,  
164 confirmed by the main effect of *Adaptor location* in Exp. 1). This effect is overall stronger for the  
165 variable context than the fixed context, particularly near the adaptor locations (blue circles are above  
166 the red circles especially for the targets at 11-33°; blue triangles are below the red triangles especially  
167 for the targets at 56-79°; significant *Context type*  $\times$  *Adaptor location* and *Context type*  $\times$  *Target location*  
168 interactions). Because this pattern is approximately symmetric and complementary (dominated by  
169 the frontal adaptor for frontal targets and the lateral adaptor for lateral targets), the differences  
170 between frontal and lateral adaptor contexts are approximately target-location independent  
171 (corresponding red lines are approximately parallel, as are the corresponding blue lines; *Context type*  $\times$   
172 *Target location*  $\times$  *Adaptor location* interaction is not significant).

173 Before comparing the results across the rooms, note that the results in panels A and B are very  
174 similar, i.e., that the subgroup of participants who also participated in Exp. 2 is representative of the

175 larger group. Panels B and C show that the effect of context was also modulated by the room in  
 176 which the stimuli were presented, and the ANOVA further suggests that the room effect changed  
 177 over time (4-way *Context type × Room × Subrun × Adaptor location* and 2-way *Subrun × Adaptor location*  
 178 interactions). These interactions did not include the *Target location* factor, suggesting again that the  
 179 important features of CP are approximately target-location independent.

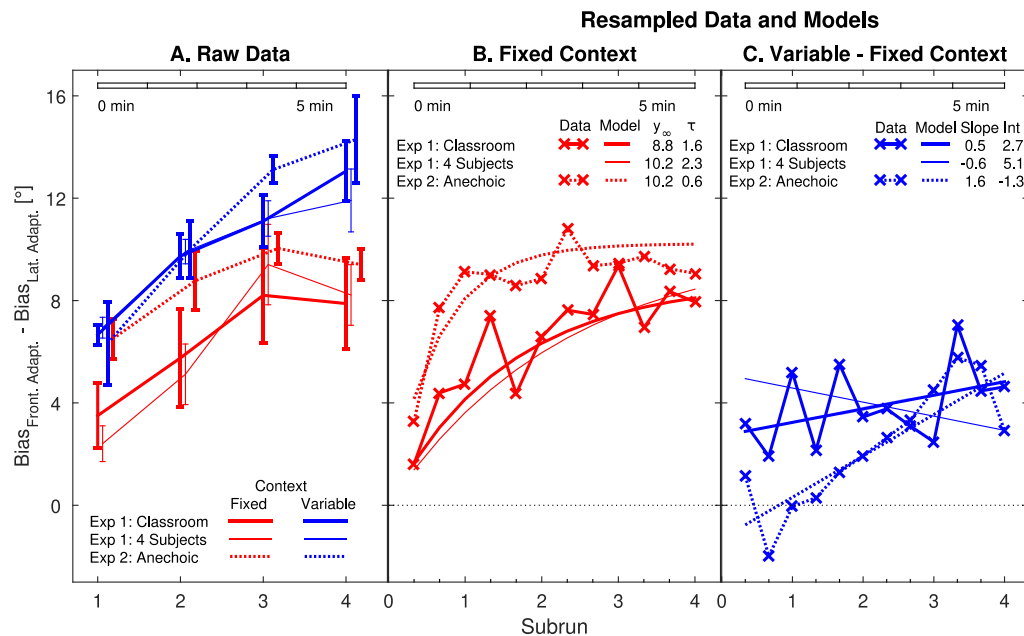

180  
 181 FIG. 3. Temporal profile of  $CP_{diff}$  for the two contexts and two rooms. A. Mean  $CP_{diff}$  ( $\pm$ SEM)  
 182 divided into 4 subruns. B. Fixed-context data rearranged to increase temporal resolution and  
 183 modeled using exponential fits (fitted parameters are shown in the inset). C. Variable context re.  
 184 fixed context data rearranged and modeled using linear fits (parameters shown in the inset).

185 We operationalize CP in terms of  $CP_{diff}$  which is the difference between frontal and lateral  
 186 context biases, averaged across target location.  $CP_{diff}$  is plotted as a function of subrun in Fig. 3A for  
 187 both experiments (differentiated by line styles, which match Fig. 2) and contexts (line color)  
 188 (Footnote 1). The results show that, overall, CP had a fast onset, reaching values between  $3^{\circ}$  and  $7^{\circ}$

189 within the first subrun. It continued to grow on the time scale of minutes in both conditions (top  
190 scale in Fig. 3A), with the rate of growth dependent on the context type and on the room. Overall,  
191 CP tended to be larger with the variable context (blue lines are above red lines) and in the anechoic  
192 room (dashed lines tend to be above solid lines). However, these effects varied over time and did  
193 not combine additively. Specifically, for the fixed context (red lines) the room effect (dashed vs.  
194 solid line) was the largest at the beginning of the run, while for the variable context (blue lines) it  
195 was largest at the end of the run. Finally, the variable context CP in both environments continued to  
196 grow between the 3<sup>rd</sup> and 4<sup>th</sup> subruns, suggesting that it did not reach its maximum over the 5-  
197 minute course of individual runs in this condition (reaching 12-14°). In the fixed context condition,  
198 CP appeared to reach its maximum of 8-10° by subrun 3.

## 199 **Discussion**

200 The analysis of the spatial properties of CP showed that 1) CP is observed as a repulsion of  
201 responses away from the adaptor location that decreases with separation between target and adaptor,  
202 and that 2) the effect is stronger in the variable context condition where the overall adaptor click  
203 rate is higher. These results are consistent with previous studies (Hládek et al., 2017; Kopčo et al.,  
204 2015) but extends the finding to lateral as well as frontal adaptors. Additionally, we find that variable  
205 and fixed context effects are similar both in their strength and spatial extent for the frontal and  
206 lateral adaptor when expressed as a function of distance from the adaptor, suggesting that the spatial  
207 representation in which CP is induced is approximately uniform, even though auditory spatial  
208 resolution decreases with azimuth (Hartmann & Rakerd, 1989).

209 The temporal analysis of CP showed that the effects of room and context type interact and are  
210 combined non-additively. Specifically, CP was strong already at the beginning of the run in both  
211 rooms for the variable context and in the anechoic room also for the fixed context, while being  
212 relatively weak in the classroom fixed context runs. Towards the end of the runs, CP became largely

213 independent of the environment while differing strongly for the two contexts. Specifically, the  
214 variable context CP continued to grow even after approximately 5 minutes, while in the fixed  
215 context the CP reached its maximum after 2-3 minutes, consistent with previous studies which only  
216 used fixed context (Hládek et al., 2017). Thus, varying the context from trial-to-trial causes at least a  
217 doubling of the time it takes CP to reach its asymptote, resulting in CP that is stronger (12-14° by  
218 subrun 4) than that observed with fixed 1-click context (8-10°) or fixed 8-click context (9°, (Hládek  
219 et al., 2017)).

## 220 **B. Modeling of the temporal profile of contextual plasticity**

221 To further increase the temporal resolution, we grouped the data from targets at 11°, 22° and 34°  
222 into one target “triplet” and data from targets at 56°, 67°, and 79° into another target triplet. By this  
223 rearrangement, the temporal resolution could be increased three-fold, as each of the original 4  
224 subruns now contained 3 data points approximately evenly distributed across it. Then, we used  
225 exponential fits to analyze the buildup of CP in the fixed context runs, and linear fits to describe the  
226 additional buildup in the variable context runs. Specifically, each subject’s fixed context CP data  
227 were fitted parametrically using the first-order exponential equation

$$228 \quad \mathbf{y}(t) = \mathbf{y}_\infty(1 - e^{-t/\tau}) \quad (1)$$

229 with time  $t$  in the units of subruns, yielding a time constant  $\tau$  for the adaptation to the context  
230 (with  $1/\tau$  as its rate) and a model estimate of the asymptotic value of CP,  $\mathbf{y}_\infty$ . The model assumed  
231 that the initial, pre-adaptation CP was 0 and that the asymptotic value of CP was equal for the two  
232 environments (consistent with the observed data). Thus only 3 parameters were fitted per subject,  
233 one  $\mathbf{y}_\infty$  for both environments and one  $\tau$  for each environment. The additional CP observed in the  
234 variable context (vs. fixed context) was modeled using a linear model as there was no evidence that  
235 the difference data deviated from linearity in either environment. The analysis was then focused on

236 the estimated slope of the adaptation, which represents the temporal properties of the additional  
237 adaptation.

238 The results of this analysis are shown in Figs. 3B and 3C. In both figures, the mean data are  
239 shown by symbols 'x', the fits for the classroom are shown by thick solid lines (the 4-subject fit is  
240 shown by thin solid lines) and the fits for the anechoic room are shown by dotted lines.

241 The fixed context data and fits in Fig. 3B (red symbols and lines, corresponding to the red lines  
242 from panel A) show that the onset of CP is faster in the anechoic room than in the classroom, and  
243 that the difference between the anechoic and classroom data is only around  $1^\circ$  towards the end of  
244 the run. As mentioned above, given the small difference at the asymptote, the model was fitted such  
245 that only one common  $y_\infty$  was used for both environments while  $\tau$  values were separate. The  
246 common fitted value of  $y_\infty$  was  $10.2^\circ$ . On the other hand, the time constant  $\tau$  differed significantly  
247 between the environments for the 4 subjects who participated in both experiments. The mean  $\tau$  was  
248 2.3 subruns in the classroom and 0.6 subruns in the anechoic room ( $t(3)=-3.178$ ,  $p=0.019$ ).

249 Fig. 3C shows, for both environments, the difference between the variable and fixed context CP  
250 data (i.e., the difference between respective blue and red data from panel A), as well as the linear fits.  
251 The data show that the effect of variable context (re. fixed context) is approximately linear in both  
252 environments. In the classroom experiment, the variable context caused an additional repulsion  
253 from the adaptor location of approximately  $4^\circ$ , independent of time (solid lines). In the anechoic  
254 room, the effect of the variable context was much slower, growing from approximately  $0^\circ$  to  $4^\circ$ . A  
255 paired-samples t-test ( $t(3)=-4.7$ ,  $p=0.018$ ) confirmed that the slopes of the fits were significantly  
256 different in the anechoic vs. reverberant room.

## 257 Discussion

258 The modeling presented in section III.B confirmed the results of the behavioral data analysis of  
259 section III.A. The exponential model fitted to the fixed context data found a significant difference in

260 adaptation rate between the two rooms, supporting the conclusion that the initial difference between  
261 the two rooms was mostly driven by a difference in speed, not strength, of CP, as the rate at least  
262 doubled in the anechoic room compared to the classroom.

263 The additional adaptation in the variable context showed either a constant or an approximately  
264 linear growth, uniform over the whole duration of the current runs. This again shows that the  
265 variable context, randomly switching between a 1-click and an 8-click adaptor, causes the adaptation  
266 to have a very slow component, much slower than those observed in our previous studies (e.g.,  
267 (Hládek et al., 2017)) and resulting in a stronger CP. Note that the additional adaptation would likely  
268 have reached an asymptotic value if the runs were sufficiently long. However, since it did not reach  
269 its asymptote in the current experiment, and since the difference between the conditions was largely  
270 linear in both environments, a linear model was sufficient to describe the data.

271 Finally, note that the presented modeling always considered the difference between the frontal-  
272 adaptor and lateral-adaptor contexts, i.e., the  $CP_{diff}$ , corresponding to a combination of two adaptive  
273 processes, one for each context. The Appendix provides the results of additional modeling  
274 performed separately for the two adaptor locations, which shows that the slow minute-scale  
275 adaptation correlates with the distribution of the stimuli in different contexts, consistent with the  
276 hypothesis that spatial auditory processing prioritizes discriminability of stimuli over unbiased  
277 localization (Lingner et al., 2018).

### 278 **C. Trial-to-trial adaptation in the variable context runs**

279 The previous section showed that one effect of varying the context on a trial-to-trial basis was  
280 that the adaptation continued to evolve over the duration of an experimental run (around 5  
281 minutes). Here, an analysis is performed on the time scale of individual trials, to examine 1) whether  
282 the extremely slow adaptation is accompanied and/or caused by a fast-varying plasticity changing  
283 after every context trial, and 2) whether this effect varies over the course of an experimental run.

284 The variable context runs included two types of context trials (1-click and 8-click adaptors),  
285 randomly interleaved with the target-only trials. In this analysis, the target-only trials were split by  
286 the type of the preceding context trial (1-click or 8-click) and plotted as a function of subrun for the  
287 classroom (Fig. 4A) and the anechoic room (Fig. 4B). In the classroom, the trials preceded by an 8-  
288 click adaptor trial show a faster onset of CP, reaching the maximum of  $12^\circ$  by the second subrun  
289 (solid lines with asterisks), while the trials preceded by a 1-click adaptor trial show CP of around  $6^\circ$   
290 in the first two subruns and only reach  $12^\circ$  adaptation in subrun 3 (lines with no symbols). On the  
291 other hand, in the anechoic room, CP grows throughout the run but there is no systematic  
292 difference based on the immediately preceding context trial type.

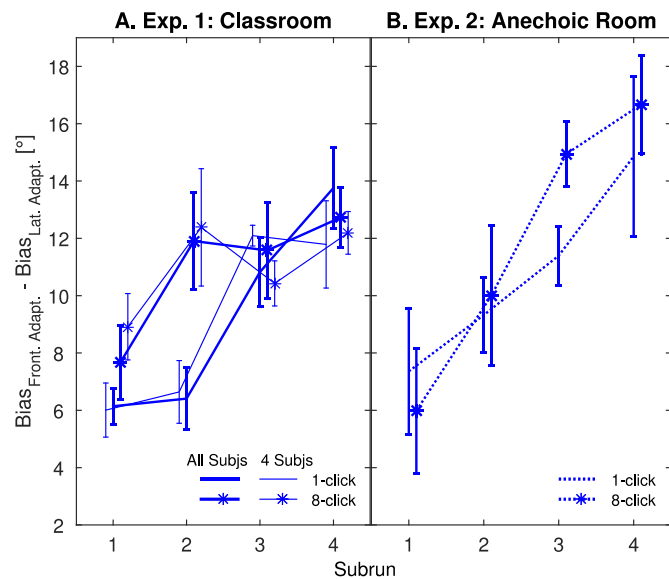

293  
294 FIG. 4. Effect of the context adaptor click rate (1-click vs. 8-click adaptor) in the immediately  
295 preceding trial on CP in the variable context condition.  $CP_{diff}$  is plotted as a function of subrun in  
296 the classroom (panel A) and the anechoic room (panel B).

297 Confirming these observations, an ANOVA with the factors of *Subrun* (1-4) and *Context* (1-click  
298 vs. 8-click) performed on the classroom data found a significant main effect of *Subrun* ( $F(3,18) =$

299 14.93,  $p = 0.0003$ ,  $\eta_p^2 = 0.71$ ) and a significant interaction *Context*  $\times$  *Subrun* ( $F(3,18) = 3.59$ ,  $p = 0.034$ ,  
300  $\eta_p^2 = 0.37$ ). A similar ANOVA performed on the anechoic data found no significant effects.

### 301 **Discussion**

302 This analysis shows that, in some instances, CP was affected by the immediately preceding  
303 context trial, such that the effect was larger following 8-click vs. 1-click adaptors. This suggests a  
304 relatively fast contextual effect, corresponding to the 3-5 sec timescale of individual trials. However,  
305 it was only observed during the first half of each run and only in the classroom. One possible  
306 explanation of this effect is that, in addition to a slow adaptation, a reverberation-suppression  
307 mechanism related to precedence buildup (Brown et al., 2012) influences these trials. Specifically, it  
308 may be that reverberation suppression effects operating on the prolonged 8-click adaptor “spill  
309 over” to affect not only the target on that trial but also that on the subsequent trial. When only 1  
310 adaptor click is presented in the context, this suppression is apparently reduced. It is not clear why  
311 this effect was restricted to the early part of each classroom run, though it is possible that the effect  
312 was simply not visible later as the CP saturated. An alternative mechanism might be related to  
313 perceptual organization, as the 8-click adaptor trials were designed to increase the perceptual  
314 segregation of the adaptors and targets (Kopčo et al., 2017). In any case, our data clearly show that  
315 each localization trial can be influenced by the immediately preceding trials, which may be an issue  
316 for task designs that intermix different conditions (e.g., Kopčo et al., 2017; Moore et al., 2020).

317

### 318 **IV. GENERAL DISCUSSION**

319 Our work shows that the spatial and temporal distribution of stimuli (or “context”) in which a  
320 listener performs a localization task has a complex influence on their behavior. The main finding of  
321 the current study was that the repeated presentation of an adaptor-target context induced a slow  
322 adaptation in the localization of targets that 1) resulted in biases of up to 14° away from the adaptor



323 location, 2) built up over at least 5 minutes, and 3) depended on the spatial and temporal structure of  
324 the adaptors, as well as on the presence of reverberation. Specifically, increasing the average number  
325 of adaptor clicks (variable context) resulted in a stronger CP, while both varying the number of  
326 clicks from trial to trial and an exposure to reverberation resulted in a slower temporal profile of the  
327 adaptation. Strikingly, the variable context resulted in adaptation that grew over time in both  
328 environments, resulting in the strongest CP we have observed to date, even stronger than that  
329 induced by a fixed 8-click context ( $9^\circ$  observed in (Hládek et al., 2017)). These effects of context  
330 type and environment are likely due to some non-linear interaction of multiple adaptive processes  
331 that depend on the adaptor presentation rate, its variability, and the presence of reflections.

332 The spatial profile of CP was originally reported to be largely independent of the adaptor-target  
333 distance (Kopčo et al., 2007). Later studies, which only used a frontal adaptor and also included no-  
334 adaptor-baseline runs, showed that the effect is stronger near the adaptor location and that it largely  
335 disappears for targets separated by  $80^\circ$  from the adaptor (Hládek et al., 2017; Kopčo et al., 2015).  
336 The current study showed that the dependence of the CP strength on the separation from the  
337 adaptor also applies to the lateral adaptors, and that the repulsive effects of frontal and lateral  
338 adaptors are similar. It is worth noting, however, that the adaptor was always at the edge of the  
339 target range in the current study. It is possible that placing the adaptor in the middle of the target  
340 range and/or using targets symmetrically located around the midline, as in the previous localization  
341 aftereffect studies (Carlile et al., 2001; Phillips & Hall, 2001; Thurlow & Jack, 1973) would result in a  
342 different pattern of adaptation.

343 The main finding concerning the temporal profile was that varying the context from trial to trial  
344 produced CP that was very slow to stabilize, continuing to grow for at least 5 mins, while fixed  
345 context CP asymptoted after 1-2 mins (Hládek et al., 2017; Kopčo et al., 2015). Such extended  
346 adaptation has not been reported in previous localization aftereffect studies, which focused on

347 effects occurring immediately post-adaptor (Carlile et al., 2001; Lingner et al., 2018), while other  
348 related studies likely observed such long-term adaptation but ascribed it to other factors (Moore et  
349 al., 2020). In future studies it would be very interesting to include long enough runs for CP to reach  
350 the asymptotic value in the variable context, so that it can be established how long such an  
351 adaptation can continue for. Another interesting finding was that, in the variable context, there was  
352 evidence for a fast adaptive component that is sensitive to the temporal structure of individual  
353 context trials. Since this fast component was not observed in the anechoic room, it is possible that it  
354 is related to reverberation suppression mechanisms evoked in the precedence effect and its buildup  
355 (Brown et al., 2012; Litovsky & Macmillan, 1994) or perceptual organization (Kopčo et al., 2017).  
356 On the other hand, our subject pool may have been too small to reveal similar effects in the  
357 anechoic room, and further investigations would be needed to make strong conclusions.  
358 Reverberation also affected the initial onset of CP, which was considerably slower in the classroom  
359 than in the anechoic room for the fixed context. Again, this difference may be related to precedence  
360 buildup mechanisms operating in the reverberant classroom. Overall, the effects of reverberation  
361 that we observed were small, and we did not find strong support for the hypothesis that CP would  
362 be weaker in reverberation where the presence of omnidirectional reverberation makes the  
363 distribution of energy more uniform around the listener.

364 Finally, while the data presented here are unable to distinguish between competing models of  
365 spatial adaptation that have been proposed in the literature, they provide some preliminary  
366 indications that may be worth following up on. For example, an exploratory analysis of the data  
367 (reported in the Appendix) shows that the slow component of CP can be well characterized as a  
368 linear drift in the spatial auditory representation in response to the overall spatial distribution of the  
369 stimuli in a particular run. Specifically, stronger drifts towards midline were observed with increased  
370 laterality of the distribution mean. Such a relationship is consistent with the idea that CP might be

371 caused by adaptation of the neural representation that shifts it towards the stimulus distribution  
372 mean (Dahmen et al., 2010; Lingner et al., 2018). The specific neural mechanisms underlying the  
373 shift might include dynamic range adaptation (Dahmen et al., 2010), synaptic gain control (Stange et  
374 al., 2013), or re-balancing of excitatory and inhibitory inputs (Magnusson et al., 2008). This “shift”  
375 model offers an alternative to “suppression” models which posit that localization aftereffects are  
376 caused by local suppression/fatiguing of spatial channels near the adaptor (e.g., Carlile, 2014). Of  
377 course, it is possible that both shift and suppression mechanisms contribute to CP and related  
378 spatial adaptation phenomena. Future experiments specifically designed to untangle these  
379 mechanisms may bring further insights.

## 380 **ACKNOWLEDGEMENTS**

381 Work supported by the Slovak Scientific Grant Agency VEGA 1/0350/22 and by EU Danube  
382 Region Strategy grant ASH (Grant Nos. APVV DS-FR-19-0025, WTZ MULT 07/2020, 45268RE).  
383 VB was partially supported by NIH-NIDCD Award No. DC015760. The authors thank Bernhard  
384 Laback for his comments on an early version of this manuscript.

385

## 386 **APPENDIX**

### 387 **Relationship between contextual plasticity buildup and stimulus distribution**

#### 388 **Motivation**

389 In this exploratory analysis, we attempted to relate the temporal profile of CP to the spatial  
390 distribution of the stimuli in different contexts. Our goal here was to provide a preliminary test of  
391 competing hypotheses about the mechanisms underlying CP.

392 While the mechanism underlying CP is largely unknown, it shares many properties with the  
393 localization aftereffect (Phillips & Hall, 2005; Thurlow & Jack, 1973). Specifically, it results in similar  
394 shifts in the perceived target location away from the adaptor location, although on a longer time

395 scale. Various models have previously been proposed for the localization aftereffect, many of them  
396 assuming that it is caused by some suppression in the neural representation of auditory space  
397 (Carlile, 2014; Dingle et al., 2012). It has also been suggested that the observed shifts are a result of a  
398 broad dynamic range adaptation of the auditory spatial representation, occurring when the stimulus  
399 distribution becomes concentrated in a subregion of the full horizontal spatial range (Dahmen et al.,  
400 2010). In this scenario, biases in responses are a negative side effect of the representation adapting  
401 to improve the spatial separability of targets presented within the subregion. This adaptation may be  
402 implemented by fitting the working point of the neural firing rates vs. the spatial location to the  
403 middle of the stimulus range (Lingner et al., 2018).

404 Motivated by the latter studies, here we examine the hypothesis that the auditory representation  
405 adapts to the non-uniform stimulus distribution in our experiments. We test a simplified prediction  
406 that the more skewed the stimulus distribution from the midline, the stronger the response biases  
407 induced by it. To test this prediction, we analyze the drifts in response biases over the course of  
408 individual runs from subrun 1 to subrun 4 and evaluate whether the slope of these drifts, averaged  
409 across target location, can be predicted by the size of the change in the stimulus distribution mean.  
410 The analysis focuses on the drifts, not on the absolute value of the change, because looking at the  
411 drifts 1) allows us to consider the frontal-context and lateral-context data separately, as we are only  
412 looking within a run, 2) only requires to use the 1<sup>st</sup> subrun as a reference (no preadaptation reference  
413 was measured), and 3) allows the analysis to focus on the slow adaptation occurring on time scale  
414 larger than 1-2 minutes (i.e., the approximate duration of one subrun), in which the drifts were  
415 largely linear. Our analysis is performed on the data presented in the main body of the current paper,  
416 as well as on additional data from Kopčo et al., (2015).

417 **1. Data from current study**

418 In Exps. 1 and 2, targets were presented from a frontal left or frontal right quadrant in the  
419 horizontal plane, with the adaptor always located at the edge of the target range (Fig. 1). The left-  
420 hand panel of Fig. A1 A shows the distributions of these click stimuli within a run, including both  
421 the adaptor and target clicks (bars), separately for the frontal-adaptor and lateral-adaptor runs (note  
422 that the distribution was identical in the two experiments). The symbols along the upper edge  
423 indicate the respective distribution means. In each of the four contexts, the stimuli are shown for the  
424 runs performed in the right-hand quadrant (the left-hand quadrant stimuli would add symmetrical  
425 distributions and means on the left-hand side). The distribution mean was between  $9^\circ$  for the  
426 frontal-adaptor variable-context runs (blue circle) and  $81^\circ$  for the lateral-adaptor variable context  
427 runs (blue triangle), with the respective fixed context means (red circle and triangle) falling between  
428 the variable context mean values. Based on our hypothesis, for the stimuli presented in the right-  
429 hand quadrant, the responses are expected to drift to the left, as the channels representing the left  
430 quadrant shift their receptive fields to the right. Additionally, this drift is expected to be larger in the  
431 lateral adaptor runs than in the frontal adaptor runs, as the distribution is skewed more positively (to  
432 the side) when the adapter is lateral.

433 The two left-hand panels of Fig. A1 B show, for the two experiments, the across-target average  
434 response bias as a function of subrun. The symbols represent the mean response bias in each  
435 subrun, separately for the fixed vs. variable contexts (red vs. blue), frontal vs. lateral adaptors (circles  
436 vs. triangles), and classroom vs. anechoic room (filled vs. open symbols). The lines show the across-  
437 subject average of linear fits through the data performed separately for each context (lines going  
438 through the triangle vs. circle data for the frontal vs. lateral context) and room (solid for classroom,  
439 dashed for anechoic room). The fits are very good, indicating that the adaptation is approximately  
440 linear over this time range. They have negative slopes for the lateral context (from -1.8 to -

441 0.94°/subrun) and slightly positive slopes for the frontal context (0.06 to 0.38°/subrun), an effect  
442 that tends to be stronger for the variable vs. fixed context (blue vs. red lines), especially in the  
443 anechoic room (dashed lines). These trends were confirmed by an ANOVA with factors of *Context*  
444 *type*, *Room*, and *Adaptor location*, performed on the slopes of the linear fits, which found a significant  
445 main effect of *Adaptor location* ( $F(1,3)=105.87$ ,  $p=0.002$ ,  $\eta_p^2= 0.9724$ ) and a significant 3-way  
446 interaction ( $F(1,3)=10.43$ ,  $p=0.048$ ,  $\eta_p^2= 0.7766$ ).

447 To directly evaluate the relationship between the distribution of the stimuli and the response  
448 drifts, the left-hand panel of Fig. A1 C plots the slope of the response drifts (from Fig. A1 B) as a  
449 function of the mean lateral position of the stimuli (from Fig. A1 A). There is a strong correlation,  
450 with the across-subject average  $r$  reaching 0.95 in the anechoic room and 0.86 in the classroom. A  
451 linear fit to the data (black line) shows that the slope of the drift in responses is inversely  
452 proportional to the mean of the stimulus distribution (slope of this fit is -0.033;  $t(6) = -10.4$ ,  
453  $p<0.0001$ ). This general result is consistent with the idea that the drift occurs as a result of a  
454 dynamic range adjustment (Dahmen et al., 2010; Lingner et al., 2018). However, there is one aspect  
455 of the data that is not consistent with this idea. While the distribution means are all positive,  
456 predicting that the drift slopes should always be negative, the slopes of the drift for the frontal  
457 contexts are slightly positive (circles in Fig. A1 C). A potential explanation for this discrepancy is  
458 that, in addition to the distribution-dependent drifts, the responses also drifted due to some other  
459 factors, like a fatiguing of the motor responses, as the subjects used a hand-held pointer to respond.

## 460 **2. Data from Kopco et al. (2015)**

461 To examine whether the slopes are influenced by the response method used by the listeners, we  
462 performed the same analysis on data from a previous study (Exp. 1 of (Kopčo et al., 2015)). That  
463 study was very similar to the current fixed-context classroom Exp. 1, differing only in two important  
464 aspects. First, three different response methods were used: 1) using a hand-held pointer while the

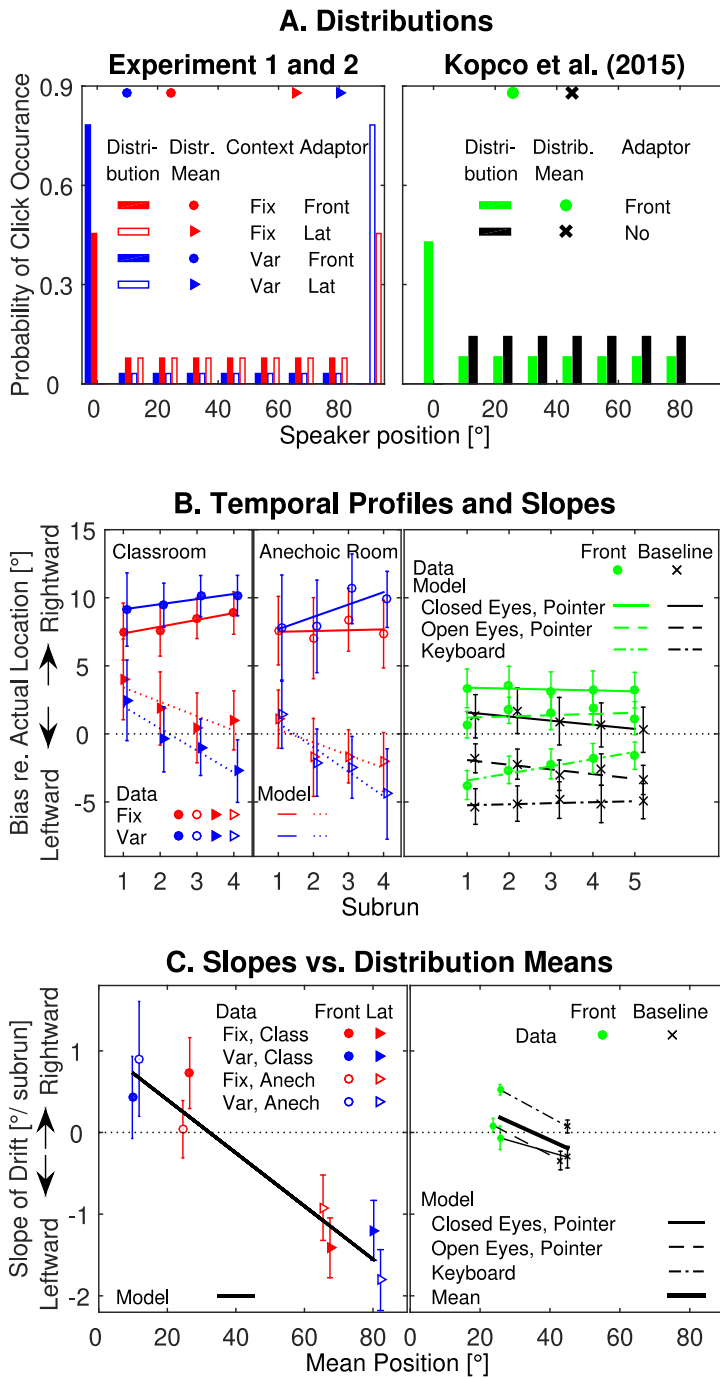

465

466 FIG. A1. Relationship between stimulus distribution and drift in responses for current Experiments

467 1 and 2 (left-hand panels) and from a previous study ( (Kopčo et al., 2015); right-hand panels). A.

468 Bars show the distribution of click stimuli in experimental runs (considering both adaptor and target  
469 clicks) separately for each context. Symbols along the upper edge indicate the stimulus distribution  
470 mean. B. For each context, symbols represent the across-subject mean of bias in responses averaged  
471 across target locations as a function of subrun. Lines represent corresponding linear fits, i.e.,  
472 temporal drifts in the responses. C. Symbols represent across-subject mean slope of the linear fit  
473 (from panel B) as a function of the stimulus distribution mean (from panel A), shown separately for  
474 each adaptor location (runs with frontal, lateral adaptor, or no adaptor). Lines show a linear fit of  
475 this relationship. Errorbars represent standard error of the mean.

476 eyes were closed (like in the current study), 2) using a hand-held pointer with the eyes open, and  
477 3) a keyboard-based method that used vision but did not require any sensory-motor spatial  
478 transformation to respond. The right-hand panel of Fig. A1 A shows the stimulus distribution in this  
479 study. The frontal-adaptor runs had distributions very similar to Exp. 1 (green vs. red filled bars),  
480 while the baseline runs had a uniform distribution with a mean at  $45^\circ$  (black bars).

481 The right-hand panel of Fig. A1 B shows the buildup of adaptation in response bias as a function  
482 of subrun, in a format similar to the left-hand panel. Here, the circles represent the frontal adaptor  
483 data and crosses the no-adaptor baseline data for all three response methods. The lines of different  
484 styles represent the linear fits for the different response methods, separately for the frontal-adaptor  
485 (green) and baseline (black) runs. There are clear differences between the lines for the different  
486 response methods, both in terms of their mean values and their drifts (e.g., solid lines are the most  
487 positive and decreasing, whereas the dash-dotted lines are the most negative and increasing). This  
488 confirms that a part of the drifts observed in Exps. 1 and 2 might be due to drifts in responses, not  
489 due to adaptation in the auditory spatial representations. However, important for the current study,  
490 the differences between frontal and baseline lines corresponding to the same response method  
491 always have a similar pattern, with the former having a more positive slope than the later (e.g.,



492 compare the green and black dash-dotted lines). Thus, the relative change in the slope of the drift  
493 appears to be independent of the response methods and thus may be related to adaptation in a  
494 spatial map. These results were confirmed by an ANOVA performed on the slope values with the  
495 factors of *Response method* (3 levels) and *Adaptor location* (frontal, baseline) which found significant  
496 main effects of *Response method* ( $F(2, 18) = 12.07, p < 0.001$ ) and *Adaptor location* ( $F(1,9) = 31.3, p <$   
497  $0.0005$ ) but no significant interaction.

498 The right-hand panel of Fig. A1 C shows the relationship between the slope of the response  
499 drifts and the mean stimulus position for the three response methods (thin lines with different styles  
500 and the corresponding 'o' and 'x' symbols), as well as for their average (thick solid line). Consistent  
501 with the current experimental results, the average fit shows that the slope of the drift in CP is  
502 inversely proportional to the mean of the stimulus distribution (slope of this fit is  $-0.022; t(9) = -$   
503  $7.46, p < 0.0001$ ). Importantly, the large vertical offsets between the lines corresponding to the  
504 different response methods show that the drift slopes are response-method dependent. Thus, only  
505 the relative differences obtained with the same response method (or the slopes) can be ascribed to  
506 adaptation in the spatial representation.

## 507 Discussion

508 This analysis showed that the slow drift in response bias is proportional to the mean lateral  
509 position of the stimuli, independent of potential drifts in motor responses or of the environment.  
510 Specifically, stronger drifts towards midline were observed with increased laterality of the  
511 distribution mean, consistent with the idea that CP might be caused by adaptation of the neural  
512 representation to the stimulus distribution such that the neural operating points or spatial channels  
513 shift towards the stimulus distribution mean (Dahmen et al., 2010; Lingner et al., 2018). This is an  
514 alternative to a previously proposed model suggesting that repulsion-by-adaptor localization  
515 aftereffects might be caused by local suppression/fatiguing of the spatial neural channels near the

516 adaptor caused by their extended stimulation (Carlile, 2014). While the current results are  
517 qualitatively consistent with a suppression mechanism, as the responses also drift from the adaptors,  
518 such a model does not predict that these drifts would grow with the adaptor laterality. Of course, it  
519 is possible that both suppression and shift mechanisms contribute to CP.

520 Note that the current analysis has several limitations. First, it assumes that the stimulus  
521 distribution mean is a relevant characterization of the distribution. Previous studies showed that  
522 other distribution statistics, like the standard deviation, also influence spatial adaptation (e.g.,  
523 (Dahmen et al., 2010)). Second, it only looks at the across-target mean drift in the responses,  
524 ignoring the fact that responses for some target locations might have drifted more than others.  
525 Future studies are needed to look both other candidate statistics (e.g., stimulus variance, range,  
526 distribution median, etc.) and on the dependence of the drifts on the target location.

## 527 FOOTNOTES

528 1 Note that the Appendix Figure A1 B shows the frontal and lateral adaptor run data separately.

529

## 530 REFERENCES (BIBLIOGRAPHIC)

531 Braasch, J., & Hartung, K. (2002). Localization in the Presence of a Distracter and Reverberation in  
532 the Frontal Horizontal Plane. I. Psychoacoustical data. *Acta Acust. United AC*, 88, 942–955.

533 Brown, G. J., Beeston, A. V, & Palomaki, K. J. (2012). Perceptual compensation for the effects of  
534 reverberation on consonant identification: A comparison of human and machine performance.

535 In *13th Annual Conference ISCA* (Vol. 13, pp. 1714–1717).

536 Canévet, C., & Meunier, S. (1996). Effect of Adaptation on Auditory Localization and Lateralization.  
537 *Acta Acust. United AC*, 82, 149–157.

538 Carlile, S. (2014). The plastic ear and perceptual relearning in auditory spatial perception. *Front.*

539 *Neurosci.*, 8, 1–13.

- 540 Carlile, S., Hyams, S., & Delaney, S. (2001). Systematic distortions of auditory space perception  
541 following prolonged exposure to broadband noise. *J. Acoust. Soc. Am.*, *110*(1), 416–424.
- 542 Clifton, R. K., Freyman, R. L., & Meo, J. (2002). What the precedence effect tells us about room  
543 acoustics. *Percept. Psychophys.*, *64*(2), 180–188.
- 544 Dahmen, J. C., Keating, P., Nodal, F. . R., Schulz, A. L., & King, A. J. (2010). Adaptation to  
545 Stimulus Statistics in the Perception and Neural Representation of Auditory Space. *Neuron*,  
546 *66*(6), 937–948. <https://doi.org/DOI 10.1016/j.neuron.2010.05.018>
- 547 Dingle, R. N., Hall, S. E., & Phillips, D. P. (2012). The three-channel model of sound localization  
548 mechanisms: Interaural level differences. *J. Acoust. Soc. Am.*, *131*(5), 4023–4029.
- 549 Djelani, T., & Blauert, J. (2001). Investigations into the build-up and breakdown of the precedence  
550 effect. *Acta Acust. United AC*, *87*(2), 253–261.
- 551 Flugel, J. C. (1921). On local fatigue in the auditory system. *Br. J. Psych.*, *11*, 105–134.
- 552 Freyman, R. L., Clifton, R. K., & Litovsky, R. Y. (1991). Dynamic Processes in the Precedence  
553 Effect. *J. Acoust. Soc. Am.*, *90*(2), 874–884.
- 554 Hartmann, W. M., & Rakerd, B. (1989). On the minimum audible angle-- a decision theory  
555 approach. *J. Acoust. Soc. Am.*, *85*, 2031–2041.
- 556 Herron, T. (2005). *C Language Exploratory Analysis of Variance with Enhancements*. January 30, 2005  
557 version. URL: <http://www.ebire.org/hcnlab/software/cleave.html>.
- 558 Hládek, Ľ., Tomoriová, B., & Kopčo, N. (2017). Temporal characteristics of contextual effects in  
559 sound localization. *J. Acoust. Soc. Am.*, *142*(5), 3288–3296.
- 560 King, A. J., Parsons, C. H., Moore, D. R., & King, A. J., Parsons, C. H. & Moore, D. R. (2000).  
561 Plasticity in the neural coding of auditory space in the mammalian brain. *P. NATL. A. SCI.*  
562 *USA*, *97*(22), 11821–11828. <https://doi.org/10.1073/pnas.97.22.11821>
- 563 Klingel, M., Kopčo, N., & Laback, B. (2021). Reweighting of Binaural Localization Cues Induced by

- 564 Lateralization Training. *J. Assoc. Res. Oto.*, 22(5), 551–566.
- 565 Kopčo, N., Andrejková, G., Best, V., & Shinn-Cunningham, B. G. (2017). Streaming and sound  
566 localization with a preceding distractor. *J. Acoust. Soc. Am.*, 141(4), EL331–EL337.
- 567 Kopčo, N., Best, V., & Carlile, S. (2010). Speech localization in a multitalker mixture. *J. Acoust. Soc.*  
568 *Am.*, 127(3), 1450–1457.
- 569 Kopčo, N., Best, V., & Shinn-Cunningham, B. G. (2007). Sound localization with a preceding  
570 distractor. *J. Acoust. Soc. Am.*, 121, 420–432.
- 571 Kopčo, N., Marcinek, L., Tomoriová, B., & Hládek, P. (2015). Contextual plasticity, top-down, and  
572 non-auditory factors in sound localization with a distractor. *J. Acoust. Soc. Am.*, 137(EL281-  
573 287).
- 574 Kumpik, D. P., Kacelnik, O., & King, A. J. (2010). Adaptive Reweighting of Auditory Localization  
575 Cues in Response to Chronic Unilateral Earplugging in Humans. *J. Neurosci.*, 30(14), 4883–  
576 4894.
- 577 Lingner, A., Pecka, M., Leibold, C., & Grothe, B., A. (2018). A novel concept for dynamic  
578 adjustment of auditory space. *Sci. Rep.*, 8(1), 1–12. [https://doi.org/10.1038/s41598-018-26690-](https://doi.org/10.1038/s41598-018-26690-0)  
579 0
- 580 Litovsky, R. Y., & Macmillan, N. A. (1994). Sound localization precision under conditions of the  
581 precedence effect: Effects of azimuth and standard stimuli. *J. Acoust. Soc. Am.*, 96(2), 753–758.
- 582 Maddox, R. K., Pospisil, D. A., Stecker, G. C., & Lee, A. K. C. (2014). Directing eye gaze enhances  
583 auditory spatial cue discrimination. *Curr. Biol.*, 24(7), 748–752.  
584 <https://doi.org/10.1016/j.cub.2014.02.021>
- 585 Magnusson, A. K., Park, T. J., Pecka, M., Grothe, B., & Koch, U. (2008). Retrograde GABA  
586 Signaling Adjusts Sound Localization by Balancing Excitation and Inhibition in the Brainstem.  
587 *Neuron*, 59, 125–137.

- 588 Moore, T. M. ., Picou, E. M. ., Hornsby, B. W. Y. ., Gallun, F. J. ., & Stecker, G. C. (2020). Binaural  
589 spatial adaptation as a mechanism for asymmetric trading of interaural time and level  
590 differences. *J. Acoust. Soc. Am.*, *148*(2), 526–541.
- 591 Phillips, D. P., & Hall, S. E. (2001). Spatial and temporal factors in auditory saltation. *J. Acoust. Soc.*  
592 *Am.*, *110*(3), 1539–1547.
- 593 Phillips, D. P., & Hall, S. E. (2005). Psychophysical evidence for adaptation of central auditory  
594 processors for interaural differences in time and level. *Hearing Res.*, *202*(1–2), 188–199.  
595 <https://doi.org/10.1016/j.heares.2004.11.001>
- 596 Recanzone, G. H. (1998). Rapidly induced auditory plasticity: The ventriloquism aftereffect. *P.*  
597 *NATL. A. SCI. USA*, *95*(3), 869–875. <https://doi.org/DOI 10.1073/pnas.95.3.869>
- 598 Shinn-Cunningham, B. G., Durlach, N. I., & Held, R. M. (1998). Adapting to supernormal auditory  
599 localization cues I: Bias and resolution. *J. Acoust. Soc. Am.*, *103*(6), 3656–3666.
- 600 Shinn-Cunningham, B. G., Kopčo, N., & Martin, T. J. (2005). Localizing nearby sound sources in a  
601 classroom: Binaural room impulse responses. *J. Acoust. Soc. Am.*, *117*(5), 3100–3115.
- 602 Stange, A., Myoga, M. H., Lingner, A., Ford, M. C., Alexandrova, O., Felmy, F., Pecka, M., Siveke,  
603 I., & Grothe, B. (2013). Adaptation in sound localization: from GABAB receptor–mediated  
604 synaptic modulation to perception. *Nat. Neurosci.*, *16*(12), 1840–1849.
- 605 Thurlow, W. R., & Jack, C. E. (1973). Some determinants of localization-adaptation effects for  
606 successive auditory stimuli. *J. Acoust. Soc. Am.*, *53*(6), 1573–1577.
- 607 Trapeau, R., & Schoenwiesner, M. (2018). The Encoding of Sound Source Elevation in the Human  
608 Auditory Cortex. *Neuroscience*, *13*, 3252–3264.
- 609 van Wanrooij, M. M., & van Opstal, A. J. (2007). Sound Localization Under Perturbed Binaural  
610 Hearing. *J. Neurophysiol.*, *97*, 715–726.
- 611
